# Supplementary material
Source: publisher figshare collection journal article supplement (https://sage.figshare.com/ndownloader/files/18090920)
Supplement: Supplementary file 1 [file 18090920]

## Supplemental Material

Supplemental Table 1. Diagnostic codes used for classification of diseases in study.

| Disease/Condition | ICD-9 Codes                                                                                                                                                    | ICD-10 Codes                                                                                |
|-------------------|----------------------------------------------------------------------------------------------------------------------------------------------------------------|---------------------------------------------------------------------------------------------|
| Type 1 diabetes   | 250.01, 250.03, 250.11, 250.13, 250.21, 250.23, 250.31, 250.33, 250.41, 250.43, 250.51, 250.53, 250.61, 250.63, 250.71, 250.73, 250.81, 250.83, 250.91, 250.93 | E10.xx                                                                                      |
| Type 2 diabetes   | 250.00, 250.02, 250.10, 250.12, 250.20, 250.22, 250.30, 250.32, 250.40, 250.42, 250.50, 250.52, 250.60, 250.62, 250.70, 250.72, 250.80, 250.82, 250.90, 250.92 | E11.xx                                                                                      |
|                   | 249.xx                                                                                                                                                         | E08.xx, E09.xx, E13.xx, E89.1                                                               |
| Hypoglycemia      | 251.2                                                                                                                                                          | E08.641, E08.649, E09.641, E09.649, E10.641, E10.649, E11.641, E11.649, E16.0, E16.1, E16.2 |

Supplemental Table 2. Patient and Admission Characteristics at Time of Index Hypoglycemic CBG Readings by Time to repeat  $\leq 15$  min

| Factor                                                    | TTR $\leq 15$ min | TTR $>15$ min     | p-value          |
|-----------------------------------------------------------|-------------------|-------------------|------------------|
|                                                           | n=17373           | n=2853            |                  |
| Age (years), median (IQR)                                 | 62.0 (47.0, 72.0) | 62.0 (50.0, 73.0) | <b>&lt;0.001</b> |
| Sex: Male, No.(%)                                         | 8044 (46.3%)      | 1382 (48.4%)      | <b>0.034</b>     |
| Race, No.(%)                                              |                   |                   |                  |
| White                                                     | 7802 (44.9%)      | 1214 (42.6%)      | <b>0.003</b>     |
| Black                                                     | 7682 (44.2%)      | 1358 (47.6%)      |                  |
| Other                                                     | 1889 (10.9%)      | 281 (9.8%)        |                  |
| BMI (kg/m <sup>2</sup> ), median (IQR)                    | 26.5 (22.1, 31.8) | 25.8 (22.0, 31.2) | <b>0.009</b>     |
| Length of stay (days), median (IQR)                       | 8.2 (4.3, 18.8)   | 8.0 (4.0, 17.5)   | <b>0.009</b>     |
| Hospital type, No.(%)                                     |                   |                   |                  |
| Academic                                                  | 10054 (57.9%)     | 1828 (64.1%)      | <b>&lt;0.001</b> |
| Community                                                 | 7319 (42.1%)      | 1025 (35.9%)      |                  |
| Admitting service at time of CBG results, No.(%)          |                   |                   |                  |
| Medicine                                                  | 5383 (31.1%)      | 793 (27.9%)       | <b>&lt;0.001</b> |
| Emergency Room                                            | 1960 (11.3%)      | 525 (18.5%)       |                  |
| Intensive Care Unit                                       | 3480 (20.1%)      | 695 (24.4%)       |                  |
| Intermediate Care Unit                                    | 1903 (11.0%)      | 335 (11.8%)       |                  |
| Labor & Delivery/ Obstetrics                              | 694 (4.0%)        | 29 (1.0%)         |                  |
| Pediatrics                                                | 180 (1.0%)        | 51 (1.8%)         |                  |
| Psychiatry                                                | 430 (2.5%)        | 47 (1.7%)         |                  |
| Operating Room                                            | 265 (1.5%)        | 43 (1.5%)         |                  |
| Procedural                                                | 218 (1.3%)        | 25 (0.9%)         |                  |
| Surgery                                                   | 2812 (16.2%)      | 302 (10.6%)       |                  |
| Diagnosis of diabetes at admission, No.(%)                |                   |                   |                  |
| None                                                      | 9904 (57.0%)      | 1607 (56.3%)      | 0.54             |
| Type 1 Diabetes                                           | 682 (3.9%)        | 114 (4.0%)        |                  |
| Type 2 Diabetes                                           | 6444 (37.1%)      | 1085 (38.0%)      |                  |
| Other types                                               | 343 (2.0%)        | 47 (1.6%)         |                  |
| Diet, No.(%)                                              |                   |                   |                  |
| Regular diet                                              | 5073 (29.2%)      | 697 (24.4%)       | <b>&lt;0.001</b> |
| Carbohydrate controlled                                   | 4653 (26.8%)      | 669 (23.4%)       |                  |
| NPO or clear liquid                                       | 5084 (29.3%)      | 863 (30.2%)       |                  |
| Other or unknown                                          | 2563 (14.8%)      | 624 (21.9%)       |                  |
| Medications On Board, No.(%)                              |                   |                   |                  |
| Glucocorticoid, No.(%)                                    | 1197 (6.9%)       | 185 (6.5%)        | 0.43             |
| Insulin, No.(%)                                           | 6606 (38.0%)      | 1068 (37.4%)      | 0.55             |
| Secretagogue, No.(%)                                      | 629 (3.6%)        | 73 (2.6%)         | <b>0.004</b>     |
| Hypoglycemia Treatment Medications <sup>a</sup> , No. (%) |                   |                   |                  |
| Dextrose oral gel                                         | 43 (0.2%)         | 7 (0.2%)          | 0.98             |
| Dextrose IV                                               | 884 (5.1%)        | 245 (8.6%)        | <b>&lt;0.001</b> |
| Glucagon IM                                               | 34 (0.2%)         | 18 (0.6%)         | <b>&lt;0.001</b> |
| Dextrose and/or glucagon                                  | 959 (5.5%)        | 2698 (9.4%)       | <b>&lt;0.001</b> |
| CBG Summary Measures                                      |                   |                   |                  |
| Index CBG Value, mg/dL, median (IQR)                      | 62.0 (54.0, 67.0) | 51.0 (39.0, 61.0) | <b>&lt;0.001</b> |
| Index Hypoglycemic Category, No.(%)                       |                   |                   |                  |
| 54-70 mg/dl                                               | 13214 (76.1%)     | 1293 (45.3%)      | <b>&lt;0.001</b> |

|                                                                                                                                                                                                                        |                    |                    |                  |
|------------------------------------------------------------------------------------------------------------------------------------------------------------------------------------------------------------------------|--------------------|--------------------|------------------|
| 40-53 mg/dl                                                                                                                                                                                                            | 3108 (17.9%)       | 846 (29.7%)        |                  |
| <40 mg/dl                                                                                                                                                                                                              | 1051 (6.0%)        | 714 (25.0%)        |                  |
| Any previous CBG $\leq$ 70 mg/dL during admission, No.(%)                                                                                                                                                              | 12139 (69.9%)      | 1951 (68.4%)       | 0.11             |
| Admission coefficient of variation of CBG, median (IQR)                                                                                                                                                                | 0.4 (0.3, 0.5)     | 0.4 (0.3, 0.5)     | <b>&lt;0.001</b> |
| Previous CBG value, median (IQR)                                                                                                                                                                                       | 80.0 (65.0, 109.0) | 85.0 (61.0, 123.5) | <b>0.011</b>     |
| <sup>a</sup> within 15 minutes of index CBG value; IV, intravenous; IM, intramuscular; NPO, nil per os; CBG, capillary blood glucose; TTR= time to repeat; IQR, Interquartile range (25th percentile, 75th percentile) |                    |                    |                  |

Supplemental Table 3. Patient and Admission Characteristics at Time of Index Hypoglycemic CBG Readings by Time to repeat 16-30 min

| Factor                                                    | TTR ≤ 15 min      | TTR 16-30 min     | p-value          |
|-----------------------------------------------------------|-------------------|-------------------|------------------|
|                                                           | n=2853            | n=3796            |                  |
| Age (years), median (IQR)                                 | 62.0 (50.0, 73.0) | 61.0 (48.0, 72.0) | <b>0.003</b>     |
| Sex: Male, No.(%)                                         | 1382 (48.4%)      | 1837 (48.4%)      | 0.97             |
| Race, No.(%)                                              |                   |                   |                  |
| White                                                     | 1214 (42.6%)      | 1754 (46.2%)      | <b>0.004</b>     |
| Black                                                     | 1358 (47.6%)      | 1651 (43.5%)      |                  |
| Other                                                     | 281 (9.8%)        | 391 (10.3%)       |                  |
| BMI (kg/m <sup>2</sup> ), median (IQR)                    | 25.8 (22.0, 31.2) | 26.1 (22.2, 31.6) | 0.25             |
| Length of stay (days), median (IQR)                       | 8.0 (4.0, 17.5)   | 8.2 (4.3, 19.2)   | <b>0.025</b>     |
| Hospital type, No.(%)                                     |                   |                   |                  |
| Academic                                                  | 1828 (64.1%)      | 2372 (62.5%)      | 0.18             |
| Community                                                 | 1025 (35.9%)      | 1424 (37.5%)      |                  |
| Admitting service at time of CBG results, No.(%)          |                   |                   |                  |
| Medicine                                                  | 793 (27.9%)       | 1151 (30.4%)      | <b>&lt;0.001</b> |
| Emergency Room                                            | 525 (18.5%)       | 459 (12.1%)       |                  |
| Intensive Care Unit                                       | 695 (24.4%)       | 801 (21.2%)       |                  |
| Intermediate Care Unit                                    | 335 (11.8%)       | 418 (11.0%)       |                  |
| Labor & Delivery/ Obstetrics                              | 29 (1.0%)         | 54 (1.4%)         |                  |
| Pediatrics                                                | 51 (1.8%)         | 42 (1.1%)         |                  |
| Psychiatry                                                | 47 (1.7%)         | 138 (3.6%)        |                  |
| Operating Room                                            | 43 (1.5%)         | 51 (1.3%)         |                  |
| Procedural                                                | 25 (0.9%)         | 42 (1.1%)         |                  |
| Surgery                                                   | 302 (10.6%)       | 631 (16.7%)       |                  |
| Diagnosis of diabetes at admission, No.(%)                |                   |                   |                  |
| None                                                      | 1607 (56.3%)      | 1924 (50.7%)      | <b>&lt;0.001</b> |
| Type 1 Diabetes                                           | 114 (4.0%)        | 212 (5.6%)        |                  |
| Type 2 Diabetes                                           | 1085 (38.0%)      | 1579 (41.6%)      |                  |
| Other types                                               | 47 (1.6%)         | 81 (2.1%)         |                  |
| Diet, No.(%)                                              |                   |                   |                  |
| Regular diet                                              | 697 (24.4%)       | 993 (26.2%)       | <b>&lt;0.001</b> |
| Carbohydrate controlled                                   | 669 (23.4%)       | 1156 (30.5%)      |                  |
| NPO or clear liquid                                       | 863 (30.2%)       | 1056 (27.8%)      |                  |
| Other or unknown                                          | 624 (21.9%)       | 591 (15.6%)       |                  |
| Medications On Board, No.(%)                              |                   |                   |                  |
| Glucocorticoid                                            | 185 (6.5%)        | 273 (7.2%)        | 0.26             |
| Insulin                                                   | 1068 (37.4%)      | 1762 (46.4%)      | <b>&lt;0.001</b> |
| Secretagogue                                              | 73 (2.6%)         | 104 (2.7%)        | 0.65             |
| Hypoglycemia Treatment Medications <sup>a</sup> , No. (%) |                   |                   |                  |
| Dextrose oral gel                                         | 7 (0.2%)          | 15 (0.4%)         | 0.29             |
| Dextrose IV                                               | 245 (8.6%)        | 365 (9.6%)        | 0.15             |
| Glucagon IM                                               | 18 (0.6%)         | 14 (0.4%)         | 0.13             |
| Dextrose and/or glucagon                                  | 268 (9.4%)        | 394 (10.4%)       | 0.18             |
| CBG Summary Measures                                      |                   |                   |                  |
| Index CBG Value, mg/dL, median (IQR)                      | 51.0 (39.0, 61.0) | 57.0 (47.0, 64.0) | <b>&lt;0.001</b> |
| Index Hypoglycemic Category, No.(%)                       |                   |                   |                  |
| 54-70 mg/dl                                               | 1293 (45.3%)      | 2257 (59.5%)      | <b>&lt;0.001</b> |

|                                                                                                                                                                                                                        |                    |                |                  |
|------------------------------------------------------------------------------------------------------------------------------------------------------------------------------------------------------------------------|--------------------|----------------|------------------|
| 40-53 mg/dl                                                                                                                                                                                                            | 846 (29.7%)        | 1042 (27.4%)   |                  |
| <40 mg/dl                                                                                                                                                                                                              | 714 (25.0%)        | 497 (13.1%)    |                  |
| Any previous CBG $\leq$ 70 mg/dL during admission, No.(%)                                                                                                                                                              | 1951 (68.4%)       | 2820 (74.3%)   | <b>&lt;0.001</b> |
| Admission coefficient of variation of CBG, median (IQR)                                                                                                                                                                | 0.4 (0.3, 0.5)     | 0.4 (0.3, 0.5) | <b>&lt;0.001</b> |
| Previous CBG value, median (IQR)                                                                                                                                                                                       | 85.0 (61.0, 123.5) | 76.0 (56.0,    | <b>&lt;0.001</b> |
| <sup>a</sup> within 15 minutes of index CBG value; IV, intravenous; IM, intramuscular; NPO, nil per os; CBG, capillary blood glucose; TTR= time to repeat; IQR, Interquartile range (25th percentile, 75th percentile) |                    |                |                  |

Supplemental Table 4. Patient and Admission Characteristics at Time of Index Hypoglycemic CBG Readings by Time to repeat 31-45 min

| Factor                                                    | TTR ≤ 15 min      | TTR 31-45 min     | p-value          |
|-----------------------------------------------------------|-------------------|-------------------|------------------|
|                                                           | n=2853            | n=2981            |                  |
| Age (years), median (IQR)                                 | 62.0 (50.0, 73.0) | 62.0 (49.0, 72.0) | <b>0.044</b>     |
| Sex: Male, No.(%)                                         | 1382 (48.4%)      | 1405 (47.1%)      | 0.32             |
| Race, No.(%)                                              |                   |                   |                  |
| White                                                     | 1214 (42.6%)      | 1318 (44.2%)      | 0.050            |
| Black                                                     | 1358 (47.6%)      | 1331 (44.6%)      |                  |
| Other                                                     | 281 (9.8%)        | 332 (11.1%)       |                  |
| BMI (kg/m2), median (IQR)                                 | 25.8 (22.0, 31.2) | 26.5 (22.0, 31.6) | 0.14             |
| Length of stay (days), median (IQR)                       | 8.0 (4.0, 17.5)   | 8.2 (4.3, 19.3)   | <b>0.025</b>     |
| Hospital type, No.(%)                                     |                   |                   |                  |
| Academic                                                  | 1828 (64.1%)      | 1779 (59.7%)      | <b>&lt;0.001</b> |
| Community                                                 | 1025 (35.9%)      | 1202 (40.3%)      |                  |
| Admitting service at time of CBG results, No.(%)          |                   |                   |                  |
| Medicine                                                  | 793 (27.9%)       | 938 (31.6%)       | <b>&lt;0.001</b> |
| Emergency Room                                            | 525 (18.5%)       | 342 (11.5%)       |                  |
| Intensive Care Unit                                       | 695 (24.4%)       | 665 (22.4%)       |                  |
| Intermediate Care Unit                                    | 335 (11.8%)       | 306 (10.3%)       |                  |
| Labor & Delivery/ Obstetrics                              | 29 (1.0%)         | 49 (1.6%)         |                  |
| Pediatrics                                                | 51 (1.8%)         | 28 (0.9%)         |                  |
| Psychiatry                                                | 47 (1.7%)         | 57 (1.9%)         |                  |
| Operating Room                                            | 43 (1.5%)         | 52 (1.8%)         |                  |
| Procedural                                                | 25 (0.9%)         | 35 (1.2%)         |                  |
| Surgery                                                   | 302 (10.6%)       | 499 (16.8%)       |                  |
| Diagnosis of diabetes at admission, No.(%)                |                   |                   |                  |
| None                                                      | 1607 (56.3%)      | 1578 (52.9%)      | <b>0.017</b>     |
| Type 1 Diabetes                                           | 114 (4.0%)        | 128 (4.3%)        |                  |
| Type 2 Diabetes                                           | 1085 (38.0%)      | 1201 (40.3%)      |                  |
| Other types                                               | 47 (1.6%)         | 74 (2.5%)         |                  |
| Diet, No.(%)                                              |                   |                   |                  |
| Regular diet                                              | 697 (24.4%)       | 762 (25.6%)       | <b>&lt;0.001</b> |
| Carbohydrate controlled                                   | 669 (23.4%)       | 862 (28.9%)       |                  |
| NPO or clear liquid                                       | 863 (30.2%)       | 911 (30.6%)       |                  |
| Other or unknown                                          | 624 (21.9%)       | 446 (15.0%)       |                  |
| Medications On Board, No.(%)                              |                   |                   |                  |
| Glucocorticoid                                            | 185 (6.5%)        | 203 (6.8%)        | 0.62             |
| Insulin                                                   | 1068 (37.4%)      | 1272 (42.7%)      | <b>&lt;0.001</b> |
| Secretagogue                                              | 73 (2.6%)         | 101 (3.4%)        | 0.063            |
| Hypoglycemia Treatment Medications <sup>a</sup> , No. (%) |                   |                   |                  |
| Dextrose oral                                             | 7 (0.2%)          | 17 (0.6%)         | 0.053            |
| Dextrose IV                                               | 245 (8.6%)        | 261 (8.8%)        | 0.82             |
| Glucagon IM                                               | 18 (0.6%)         | 8 (0.3%)          | <b>0.038</b>     |
| Dextrose and/or glucagon                                  | 268 (9.4%)        | 284 (9.5%)        | 0.86             |
| CBG Summary Measures                                      |                   |                   |                  |
| BG Value, mg/dL, median (IQR)                             | 51.0 (39.0, 61.0) | 59.0 (51.0, 65.0) | <b>&lt;0.001</b> |
| Index Hypoglycemic Category, No.(%)                       |                   |                   |                  |
| 54-70 mg/dl                                               | 1293 (45.3%)      | 2017 (67.7%)      | <b>&lt;0.001</b> |

|                                                                                                                                                                                                                        |                    |                |                  |
|------------------------------------------------------------------------------------------------------------------------------------------------------------------------------------------------------------------------|--------------------|----------------|------------------|
| 40-53 mg/dl                                                                                                                                                                                                            | 846 (29.7%)        | 718 (24.1%)    |                  |
| <40 mg/dl                                                                                                                                                                                                              | 714 (25.0%)        | 246 (8.3%)     |                  |
| Any previous CBG $\leq$ 70 mg/dL during admission, No.(%)                                                                                                                                                              | 1951 (68.4%)       | 2188 (73.4%)   | <b>&lt;0.001</b> |
| Admission coefficient of variation of CBG, median (IQR)                                                                                                                                                                | 0.4 (0.3, 0.5)     | 0.4 (0.3, 0.5) | 0.34             |
| Previous CBG value, median (IQR)                                                                                                                                                                                       | 85.0 (61.0, 123.5) | 79.0 (60.0,    | <b>&lt;0.001</b> |
| <sup>a</sup> within 15 minutes of index CBG value; IV, intravenous; IM, intramuscular; NPO, nil per os; CBG, capillary blood glucose; TTR= time to repeat; IQR, Interquartile range (25th percentile, 75th percentile) |                    |                |                  |

Supplemental Table 5. Patient and Admission Characteristics at Time of Index Hypoglycemic CBG Readings by Time to repeat 46-60 min

| Factor                                                    | TTR ≤ 15 min      | TTR 46-60 min     | P-value          |
|-----------------------------------------------------------|-------------------|-------------------|------------------|
| No. of Index CBG events                                   | n=2,853           | n=2,033           | -                |
| Age (years), median (IQR)                                 | 62.0 (50.0, 73.0) | 61.0 (47.0, 71.0) | <b>&lt;0.001</b> |
| Sex: Male, No.(%)                                         | 1382 (48.4%)      | 950 (46.7%)       | 0.24             |
| Race, No.(%)                                              |                   |                   |                  |
| White                                                     | 1214 (42.6%)      | 906 (44.6%)       | 0.002            |
| Black                                                     | 1358 (47.6%)      | 877 (43.1%)       |                  |
| Other                                                     | 281 (9.8%)        | 250 (12.3%)       |                  |
| BMI (kg/m <sup>2</sup> ), median (IQR)                    | 25.8 (22.0, 31.2) | 26.8 (22.5, 31.9) | <b>&lt;0.001</b> |
| Length of stay (days), median (IQR)                       | 8.0 (4.0, 17.5)   | 7.4 (4.1, 17.2)   | 0.42             |
| Hospital type, No.(%)                                     |                   |                   |                  |
| Academic                                                  | 1828 (64.1%)      | 1159 (57.0%)      | <b>&lt;0.001</b> |
| Community                                                 | 1025 (35.9%)      | 874 (43.0%)       |                  |
| Admitting service at time of CBG results, No.(%)          |                   |                   |                  |
| Medicine                                                  | 793 (27.9%)       | 578 (28.5%)       | <b>&lt;0.001</b> |
| Emergency Room                                            | 525 (18.5%)       | 256 (12.6%)       |                  |
| Intensive Care Unit                                       | 695 (24.4%)       | 482 (23.8%)       |                  |
| Intermediate Care Unit                                    | 335 (11.8%)       | 208 (10.3%)       |                  |
| Labor & Delivery/ Obstetrics                              | 29 (1.0%)         | 61 (3.0%)         |                  |
| Pediatrics                                                | 51 (1.8%)         | 24 (1.2%)         |                  |
| Psychiatry                                                | 47 (1.7%)         | 38 (1.9%)         |                  |
| Operating Room                                            | 43 (1.5%)         | 39 (1.9%)         |                  |
| Procedural                                                | 25 (0.9%)         | 29 (1.4%)         |                  |
| Surgery                                                   | 302 (10.6%)       | 314 (15.5%)       |                  |
| Diagnosis of diabetes at admission, No.(%)                |                   |                   |                  |
| None                                                      | 1607 (56.3%)      | 1137 (55.9%)      | 0.25             |
| Type 1 Diabetes                                           | 114 (4.0%)        | 89 (4.4%)         |                  |
| Type 2 Diabetes                                           | 1085 (38.0%)      | 758 (37.3%)       |                  |
| Other types                                               | 47 (1.6%)         | 49 (2.4%)         |                  |
| Diet, No.(%)                                              |                   |                   |                  |
| Regular diet                                              | 697 (24.4%)       | 499 (24.5%)       | <b>&lt;0.001</b> |
| Carbohydrate controlled                                   | 669 (23.4%)       | 555 (27.3%)       |                  |
| NPO or clear liquid                                       | 863 (30.2%)       | 616 (30.3%)       |                  |
| Other or unknown                                          | 624 (21.9%)       | 363 (17.9%)       |                  |
| Medications On Board, No.(%)                              |                   |                   |                  |
| Glucocorticoid                                            | 185 (6.5%)        | 116 (5.7%)        | 0.26             |
| Insulin                                                   | 1068 (37.4%)      | 794 (39.1%)       | 0.25             |
| Secretagogue                                              | 73 (2.6%)         | 67 (3.3%)         | 0.13             |
| Hypoglycemia Treatment Medications <sup>a</sup> , No. (%) |                   |                   |                  |
| Dextrose oral                                             | 7 (0.2%)          | 6 (0.3%)          | 0.74             |
| Dextrose IV                                               | 245 (8.6%)        | 98 (4.8%)         | <b>&lt;0.001</b> |
| Glucagon IM                                               | 18 (0.6%)         | 3 (0.1%)          | <b>0.011</b>     |
| Dextrose and/or glucagon                                  | 268 (9.4%)        | 107 (5.3%)        | <b>&lt;0.001</b> |
| CBG Summary Measures                                      |                   |                   |                  |
| BG Value, mg/dL, median (IQR)                             | 51.0 (39.0, 61.0) | 61.0 (53.0, 67.0) | <b>&lt;0.001</b> |
| Index Hypoglycemic Category, No.(%)                       |                   |                   |                  |



|                                                                                                                                                                                                                        |                    |                |                  |
|------------------------------------------------------------------------------------------------------------------------------------------------------------------------------------------------------------------------|--------------------|----------------|------------------|
| 54-70 mg/dl                                                                                                                                                                                                            | 1293 (45.3%)       | 1518 (74.7%)   | <b>&lt;0.001</b> |
| 40-53 mg/dl                                                                                                                                                                                                            | 846 (29.7%)        | 387 (19.0%)    |                  |
| <40 mg/dl                                                                                                                                                                                                              | 714 (25.0%)        | 128 (6.3%)     |                  |
| Any previous CBG $\leq$ 70 mg/dL during admission, No.(%)                                                                                                                                                              | 1951 (68.4%)       | 1424 (70.0%)   | 0.22             |
| Admission coefficient of variation of CBG, median (IQR)                                                                                                                                                                | 0.4 (0.3, 0.5)     | 0.4 (0.3, 0.5) | 0.14             |
| Previous CBG value, median (IQR)                                                                                                                                                                                       | 85.0 (61.0, 123.5) | 80.0 (65.0,    | <b>0.018</b>     |
| <sup>a</sup> within 15 minutes of index CBG value; IV, intravenous; IM, intramuscular; NPO, nil per os; CBG, capillary blood glucose; TTR= time to repeat; IQR, Interquartile range (25th percentile, 75th percentile) |                    |                |                  |

Supplemental Table 6. Patient and Admission Characteristics at Time of Index Hypoglycemic CBG Readings by Time to repeat >60 min

| Factor                                                    | TTR ≤ 15 min      | TTR >60 min       | p-value          |
|-----------------------------------------------------------|-------------------|-------------------|------------------|
|                                                           | n=2853            | n=8563            |                  |
| Age (years), median (IQR)                                 | 62.0 (50.0, 73.0) | 62.0 (47.0, 72.0) | <b>&lt;0.001</b> |
| Sex: Male, No.(%)                                         | 1382 (48.4%)      | 3852 (45.0%)      | <b>0.001</b>     |
| Race, No.(%)                                              |                   |                   |                  |
| White                                                     | 1214 (42.6%)      | 3824 (44.7%)      | <b>0.021</b>     |
| Black                                                     | 1358 (47.6%)      | 3823 (44.6%)      |                  |
| Other                                                     | 281 (9.8%)        | 916 (10.7%)       |                  |
| BMI (kg/m2), median (IQR)                                 | 25.8 (22.0, 31.2) | 26.5 (22.0, 31.9) | <b>0.012</b>     |
| Length of stay (days), median (IQR)                       | 8.0 (4.0, 17.5)   | 8.4 (4.5, 18.9)   | <b>0.002</b>     |
| Hospital type, No.(%)                                     |                   |                   |                  |
| Academic                                                  | 1828 (64.1%)      | 4744 (55.4%)      | <b>&lt;0.001</b> |
| Community                                                 | 1025 (35.9%)      | 3819 (44.6%)      |                  |
| Admitting service at time of CBG results, No.(%)          |                   |                   |                  |
| Medicine                                                  | 793 (27.9%)       | 2716 (31.8%)      | <b>&lt;0.001</b> |
| Emergency Room                                            | 525 (18.5%)       | 903 (10.6%)       |                  |
| Intensive Care Unit                                       | 695 (24.4%)       | 1532 (17.9%)      |                  |
| Intermediate Care Unit                                    | 335 (11.8%)       | 971 (11.4%)       |                  |
| Labor & Delivery/ Obstetrics                              | 29 (1.0%)         | 530 (6.2%)        |                  |
| Pediatrics                                                | 51 (1.8%)         | 86 (1.0%)         |                  |
| Psychiatry                                                | 47 (1.7%)         | 197 (2.3%)        |                  |
| Operating Room                                            | 43 (1.5%)         | 123 (1.4%)        |                  |
| Procedural                                                | 25 (0.9%)         | 112 (1.3%)        |                  |
| Surgery                                                   | 302 (10.6%)       | 1368 (16.0%)      |                  |
| Diagnosis of diabetes at admission, No.(%)                |                   |                   |                  |
| None                                                      | 1607 (56.3%)      | 5265 (61.5%)      | <b>&lt;0.001</b> |
| Type 1 Diabetes                                           | 114 (4.0%)        | 253 (3.0%)        |                  |
| Type 2 Diabetes                                           | 1085 (38.0%)      | 2906 (33.9%)      |                  |
| Other types                                               | 47 (1.6%)         | 139 (1.6%)        |                  |
| Diet, No.(%)                                              |                   |                   |                  |
| Regular diet                                              | 697 (24.4%)       | 2819 (32.9%)      | <b>&lt;0.001</b> |
| Carbohydrate controlled                                   | 669 (23.4%)       | 2080 (24.3%)      |                  |
| NPO or clear liquid                                       | 863 (30.2%)       | 2501 (29.2%)      |                  |
| Other or unknown                                          | 624 (21.9%)       | 1163 (13.6%)      |                  |
| Medications On Board, No.(%)                              |                   |                   |                  |
| Glucocorticoid                                            | 185 (6.5%)        | 605 (7.1%)        | 0.29             |
| Insulin                                                   | 1068 (37.4%)      | 2778 (32.4%)      | <b>&lt;0.001</b> |
| Secretagogue                                              | 73 (2.6%)         | 357 (4.2%)        | <b>&lt;0.001</b> |
| Hypoglycemia Treatment Medications <sup>a</sup> , No. (%) |                   |                   |                  |
| Dextrose oral                                             | 7 (0.2%)          | 5 (0.1%)          | <b>0.008</b>     |
| Dextrose IV                                               | 245 (8.6%)        | 160 (1.9%)        | <b>&lt;0.001</b> |
| Glucagon IM                                               | 18 (0.6%)         | 9 (0.1%)          | <b>&lt;0.001</b> |
| Dextrose and/or glucagon                                  | 268 (9.4%)        | 174 (2.0%)        | <b>&lt;0.001</b> |
| CBG Summary Measures                                      |                   |                   |                  |
| BG Value, mg/dL, median (IQR)                             | 51.0 (39.0, 61.0) | 65.0 (59.0, 68.0) | <b>&lt;0.001</b> |
| Index Hypoglycemic Category, No.(%)                       |                   |                   |                  |
| 54-70 mg/dl                                               | 1293 (45.3%)      | 7422 (86.7%)      | <b>&lt;0.001</b> |

|                                                                                                                                                                                                                        |                    |                |                  |
|------------------------------------------------------------------------------------------------------------------------------------------------------------------------------------------------------------------------|--------------------|----------------|------------------|
| 40-53 mg/dl                                                                                                                                                                                                            | 846 (29.7%)        | 961 (11.2%)    |                  |
| <40 mg/dl                                                                                                                                                                                                              | 714 (25.0%)        | 180 (2.1%)     |                  |
| Any previous CBG $\leq$ 70 mg/dL during admission, No.(%)                                                                                                                                                              | 1951 (68.4%)       | 5707 (66.6%)   | 0.087            |
| Admission coefficient of variation of CBG, median (IQR)                                                                                                                                                                | 0.4 (0.3, 0.5)     | 0.3 (0.2, 0.4) | <b>&lt;0.001</b> |
| Previous CBG value, median (IQR)                                                                                                                                                                                       | 85.0 (61.0, 123.5) | 82.0 (69.0,    | 0.47             |
| <sup>a</sup> within 15 minutes of index CBG value; IV, intravenous; IM, intramuscular; NPO, nil per os; CBG, capillary blood glucose; TTR= time to repeat; IQR, Interquartile range (25th percentile, 75th percentile) |                    |                |                  |

Supplemental Figure 1. Adjusted Odds Ratio of TTR  $\leq 15$  minutes by Patient and Hospital Characteristics Excluding Repeated Hypoglycemic Readings within 30 min of Index Reading.

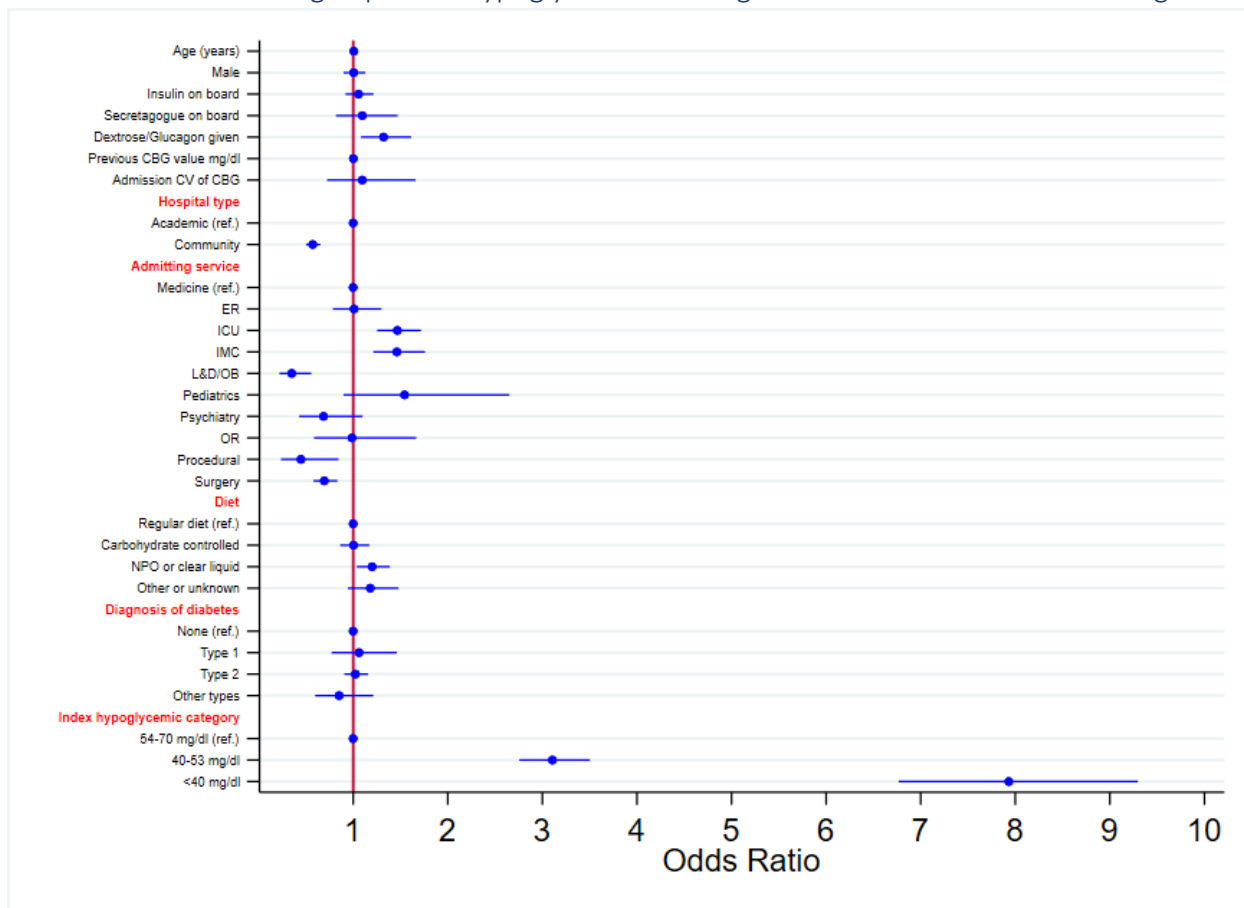

Figure legend: CBG, capillary blood glucose; CV, coefficient of variation; ER, emergency room; ICU, intensive care unit; IMC, intermediate care unit; L&D/OB, labor & delivery/obstetrics; OR, operating room; NPO, nil per os; TTR, time-to-repeat

Supplemental Figure 2. Adjusted Odds Ratios of Patient Admission Characteristics at Time of Index Hypoglycemia Reading and TTR Outcome Measures Excluding Repeated Hypoglycemic Readings within 30 min of Index Reading.

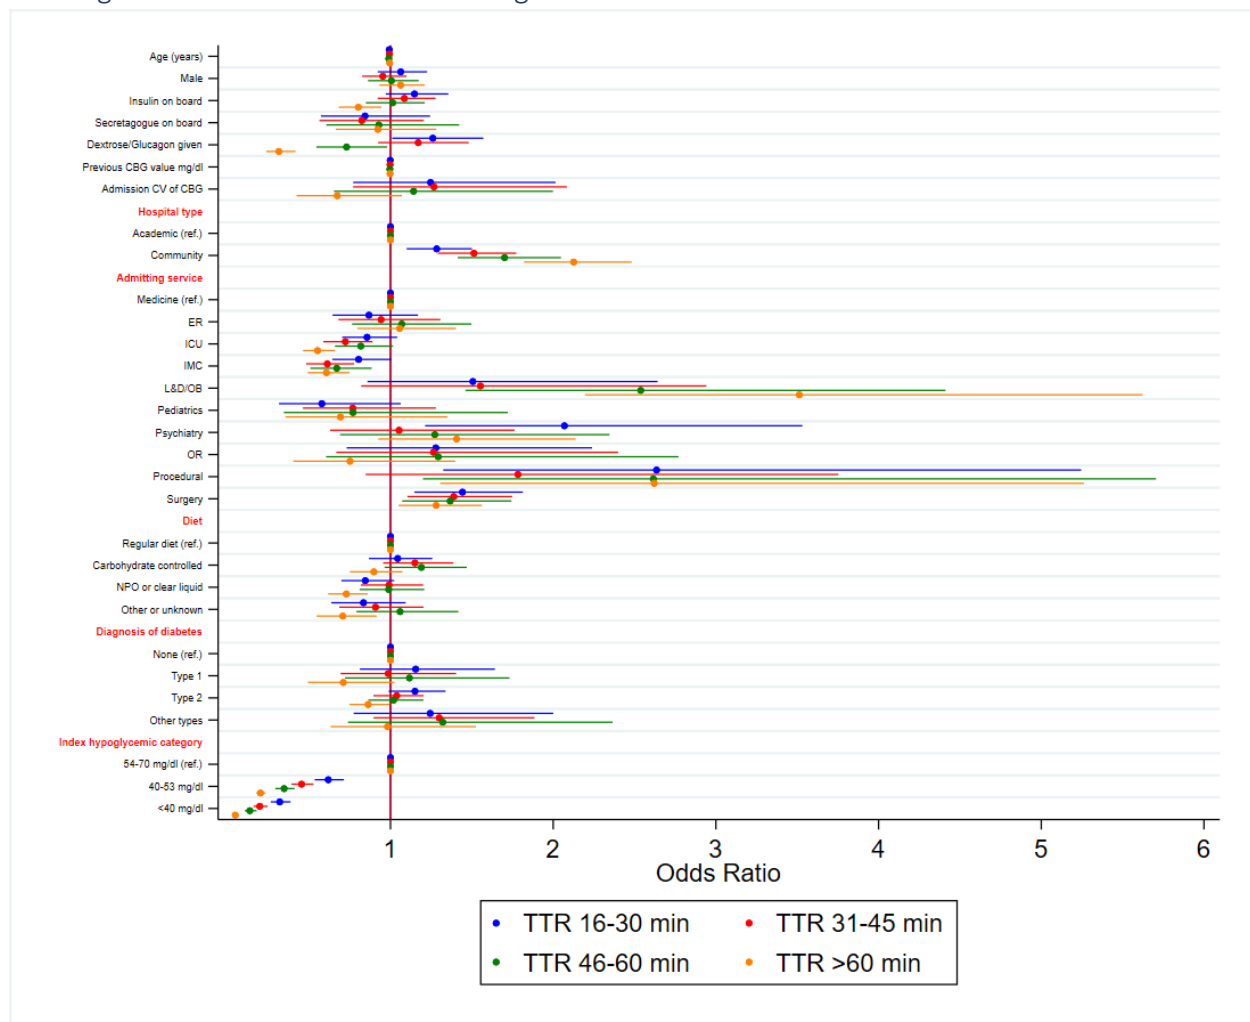

Figure legend: CBG, capillary blood glucose; CV, coefficient of variation; ER, emergency room; ICU, intensive care unit; IMC, intermediate care unit; L&D/OB, labor & delivery/obstetrics; OR, operating room; NPO, nil per os; TTR, time-to-repeat

Supplemental Figure 3. Adjusted Odds Ratio of TTR  $\leq 15$  minutes by Patient and Hospital Characteristics Excluding Repeated Hypoglycemic Readings within 60 min of Index Reading.

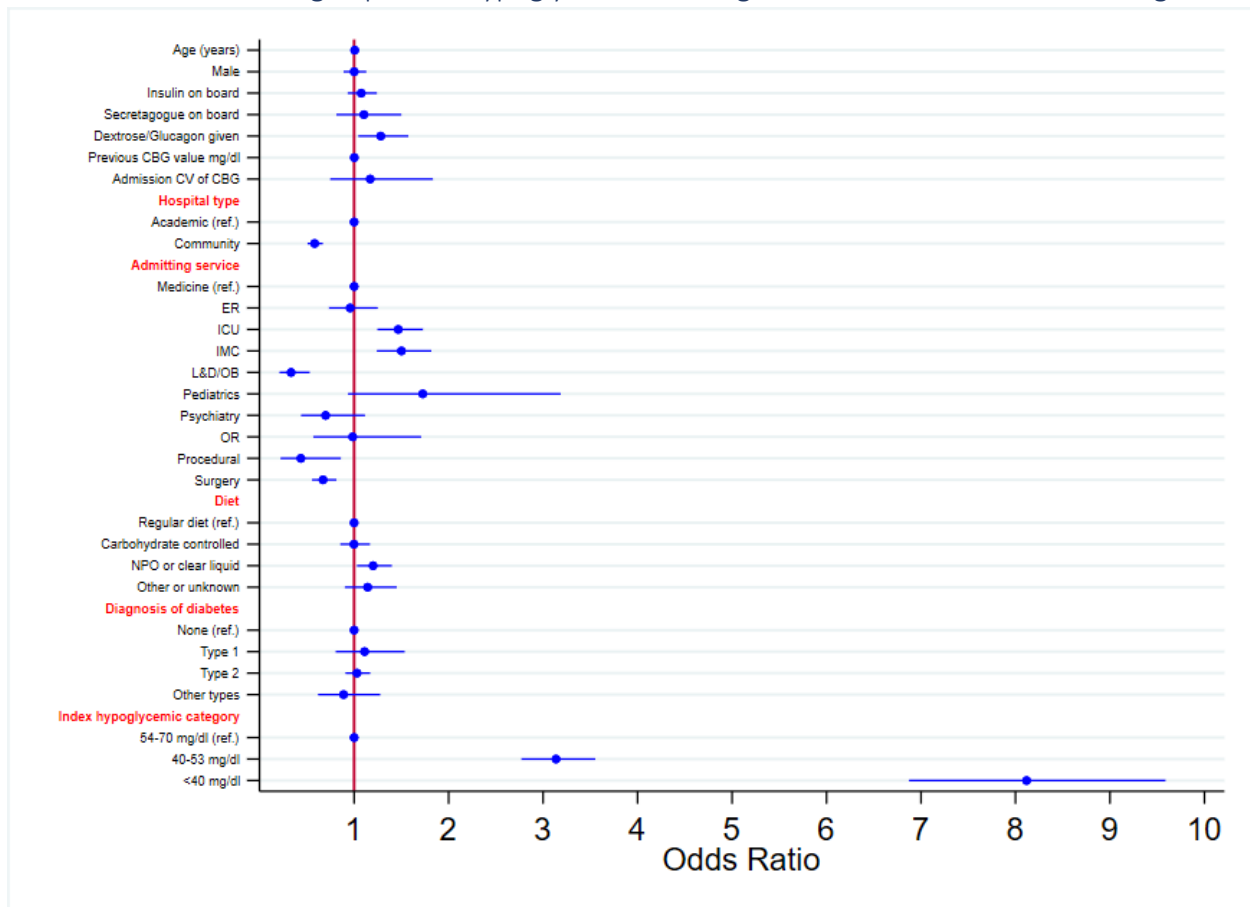

Figure legend: CBG, capillary blood glucose; CV, coefficient of variation; ER, emergency room; ICU, intensive care unit; IMC, intermediate care unit; L&D/OB, labor & delivery/obstetrics; OR, operating room; NPO, nil per os; TTR, time-to-repeat

Supplemental Figure 4. Adjusted Odds Ratios of Patient Admission Characteristics at Time of Index Hypoglycemia Reading and TTR Outcome Measures Excluding Repeated Hypoglycemic Readings within 60 min of Index Reading

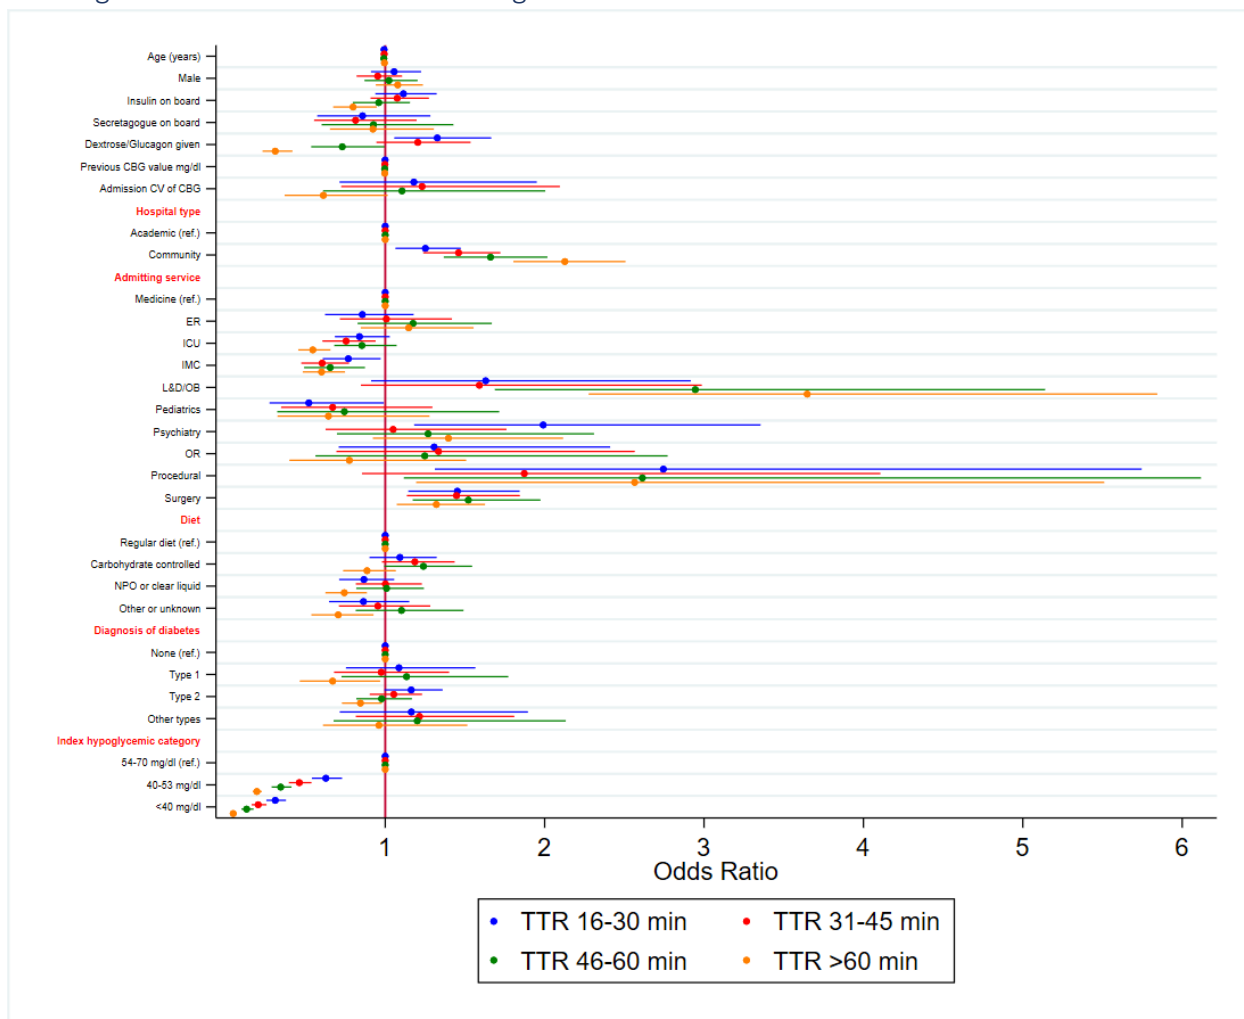

Figure legend: CBG, capillary blood glucose; CV, coefficient of variation; ER, emergency room; ICU, intensive care unit; IMC, intermediate care unit; L&D/OB, labor & delivery/obstetrics; OR, operating room; NPO, nil per os; TTR, time-to-repeat

Supplemental Figure 5. Adjusted Odds Ratio of TTR  $\leq 15$  minutes by Patient and Hospital Characteristics Excluding Repeated Hypoglycemic Readings within 2 hours of Index Reading.

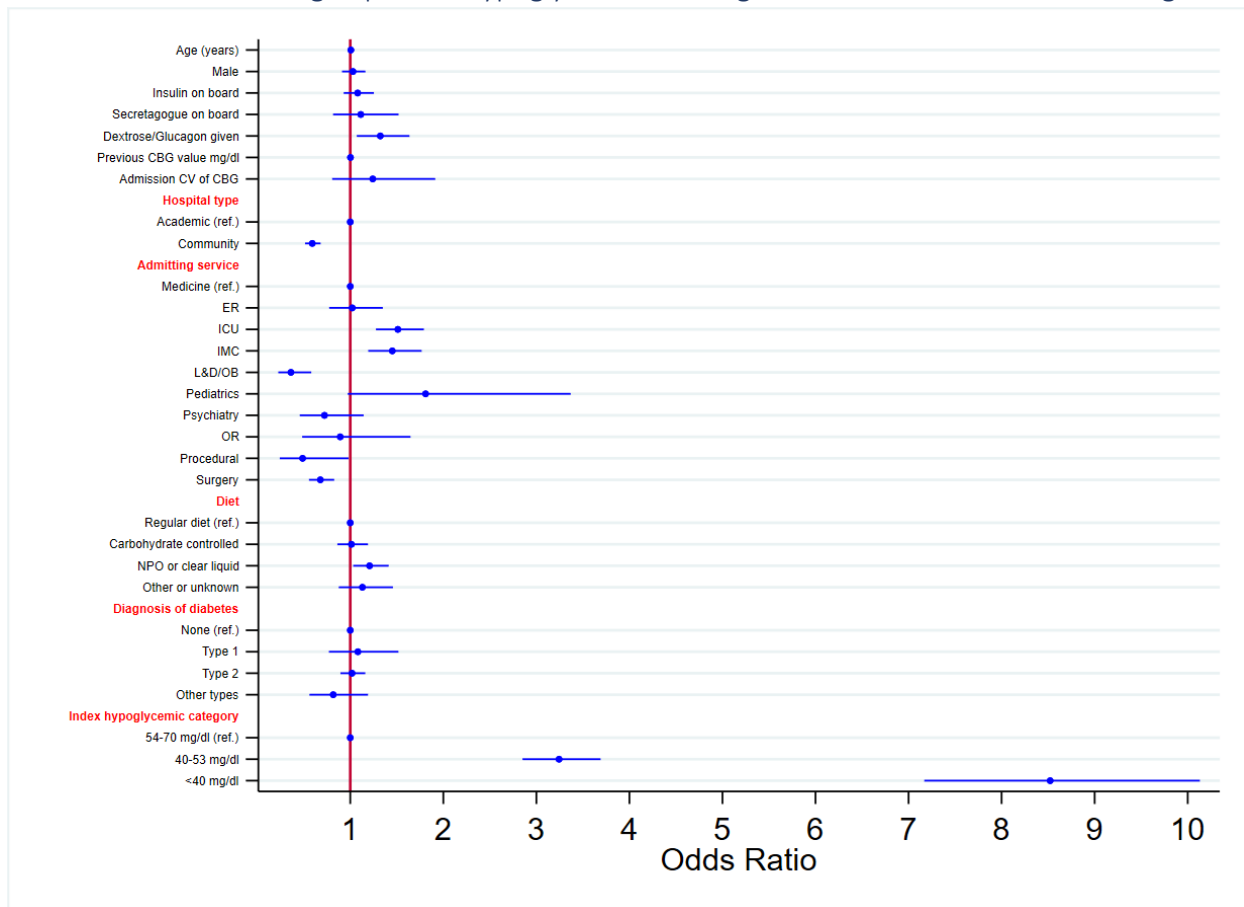

Figure legend: CBG, capillary blood glucose; CV, coefficient of variation; ER, emergency room; ICU, intensive care unit; IMC, intermediate care unit; L&D/OB, labor & delivery/obstetrics; OR, operating room; NPO, nil per os; TTR, time-to-repeat



Supplemental Figure 6. Adjusted Odds Ratios of Patient Admission Characteristics at Time of Index Hypoglycemia Reading and TTR Outcome Measures Excluding Repeated Hypoglycemic Readings within 2 hours of Index Reading

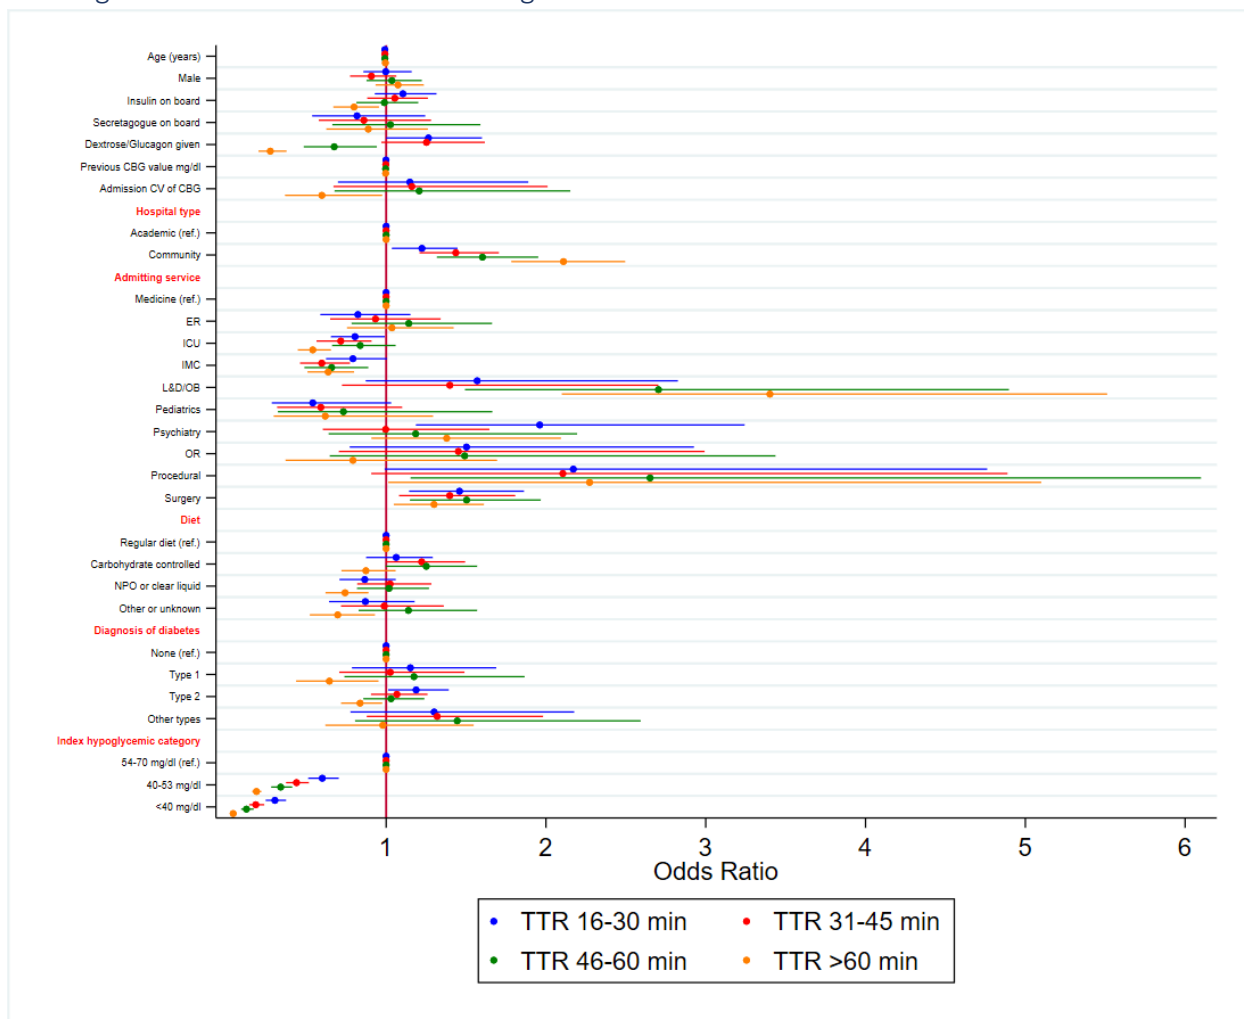

Figure legend: CBG, capillary blood glucose; CV, coefficient of variation; ER, emergency room; ICU, intensive care unit; IMC, intermediate care unit; L&D/OB, labor & delivery/obstetrics; OR, operating room; NPO, nil per os; TTR, time-to-repeat

Supplemental Figure 7. Adjusted Odds Ratio of TTR  $\leq 15$  minutes by Patient and Hospital Characteristics Excluding Repeated Hypoglycemic Readings on Same Day as Index Reading.

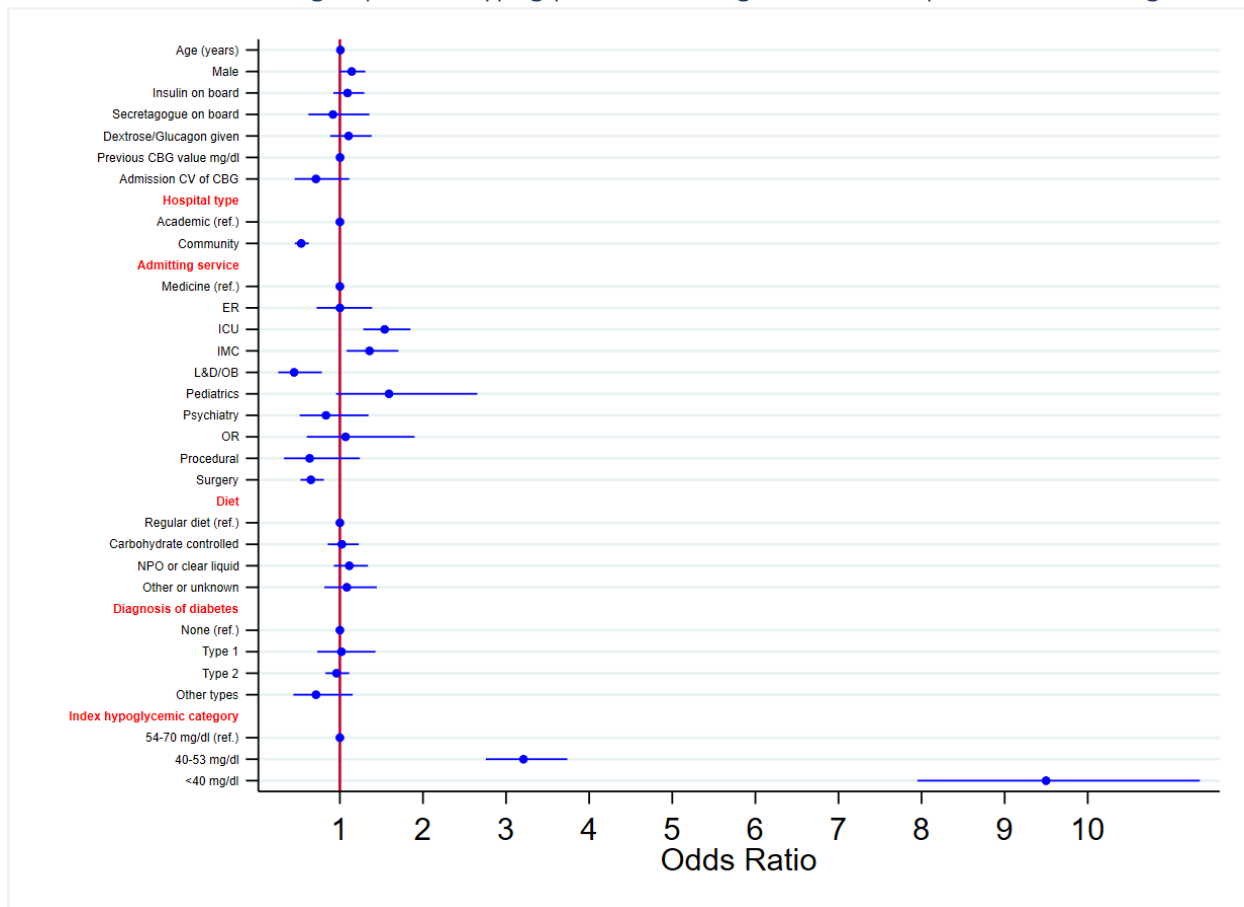

Figure legend: CBG, capillary blood glucose; CV, coefficient of variation; ER, emergency room; ICU, intensive care unit; IMC, intermediate care unit; L&D/OB, labor & delivery/obstetrics; OR, operating room; NPO, nil per os; TTR, time-to-repeat

Supplemental Figure 8. Adjusted Odds Ratios of Patient Admission Characteristics at Time of Index Hypoglycemia Reading and TTR Outcome Measures Excluding Repeated Hypoglycemic Readings on Same Day as Index Reading

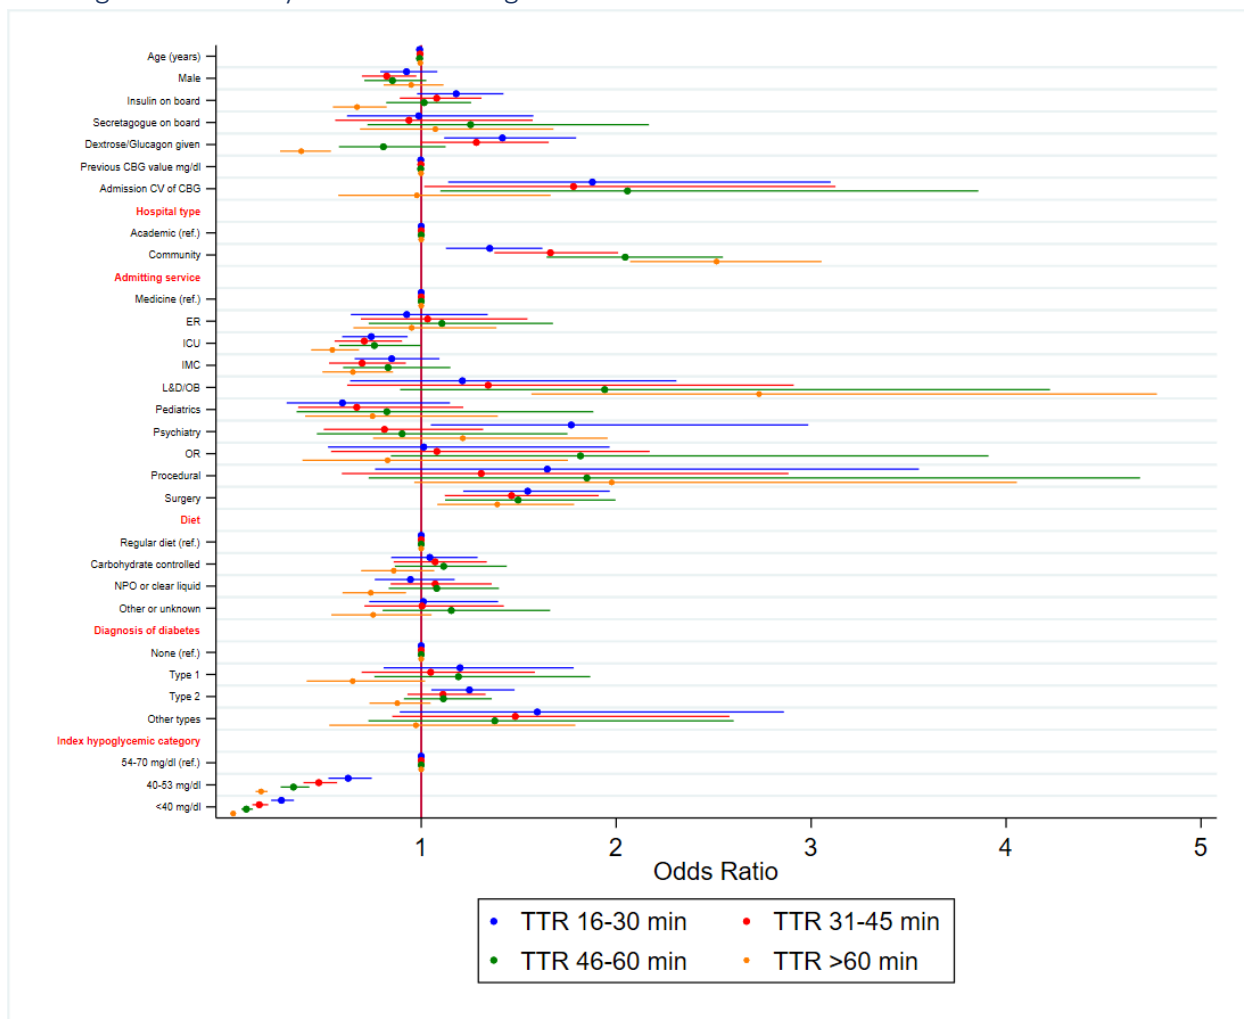

Figure legend: CBG, capillary blood glucose; CV, coefficient of variation; ER, emergency room; ICU, intensive care unit; IMC, intermediate care unit; L&D/OB, labor & delivery/obstetrics; OR, operating room; NPO, nil per os; TTR, time-to-repeat
